# Supplementary material for: New Clonal Strain of Candida auris, Delhi, India: New Clonal Strain of Candida auris, Delhi, India
Source: PubMed Central journal article supplement (PMC3810747; doi:10.3201/eid1910.130393), 2013-10
Supplement: 13-0393-Techapp-s1.pdf [file 13-0393-Techapp-s1.pdf]

# New Clonal Strain of *Candida auris*, Delhi, India

## Technical Appendix

Technical Appendix Table. Clinical evaluation of 12 *Candida auris* fungemia patients investigated from 2 hospitals, Delhi, India, 2009–2011

| Characteristic                         | Case-patient no.                              |                       |                              |                                                         |                          |                                                      |                           |                                  |                                               |                                     |                                    |                                                        |
|----------------------------------------|-----------------------------------------------|-----------------------|------------------------------|---------------------------------------------------------|--------------------------|------------------------------------------------------|---------------------------|----------------------------------|-----------------------------------------------|-------------------------------------|------------------------------------|--------------------------------------------------------|
|                                        | 1                                             | 2                     | 3                            | 4                                                       | 5                        | 6                                                    | 7                         | 8                                | 9                                             | 10                                  | 11                                 | 12                                                     |
| Age/sex                                | 3 d/F                                         | 10 d/F                | 28 d/F                       | 45 d/F                                                  | 10 y/M                   | 45 y/M                                               | 47 y/F                    | 59 y/M                           | 60 y/F                                        | 65 y/F                              | 67 y/M                             | 74 y/M                                                 |
| Diagnosis                              | PT, TEF, ICH sepsis                           | PT, ELBW, sepsis, DIC | Pneumonia, late onset sepsis | Meningitis, septic shock, PDA, ASD, fetal distress, IMV | ALL, CKD                 | Decompensated alcoholic liver cirrhosis, CKD, sepsis | DM, ESRD                  | HIV, cryptococcal meningitis, DM | ESRD, DM                                      | Recurrence of ovarian carcinoma, DM | COPD exacerbation sepsis, DM, ESRD | Jejunal perforation, peritonitis, septicemia, MODS, DM |
| Risk factor                            |                                               |                       |                              |                                                         |                          |                                                      |                           |                                  |                                               |                                     |                                    |                                                        |
| Immunosuppression                      | +                                             | +                     | –                            | +                                                       | +                        | +                                                    | +                         | +                                | +                                             | +                                   | +                                  | +                                                      |
| Neutropenia (<10 <sup>9</sup> cells/L) | +                                             | +                     | +                            | –                                                       | +                        | –                                                    | –                         | +                                | –                                             | +                                   | –                                  | –                                                      |
| CVC                                    | –                                             | +                     | +                            | +                                                       | +                        | –                                                    | –                         | –                                | –                                             | –                                   | –                                  | +                                                      |
| Broad-spectrum antibiotics             | +                                             | +                     | +                            | +                                                       | +                        | –                                                    | –                         | +                                | +                                             | +                                   | –                                  | +                                                      |
| Parenteral nutrition                   | –                                             | –                     | –                            | –                                                       | –                        | –                                                    | –                         | –                                | –                                             | –                                   | –                                  | –                                                      |
| Surgery within 30 d                    | –                                             | –                     | –                            | +                                                       | –                        | –                                                    | –                         | –                                | –                                             | –                                   | +                                  | +                                                      |
| Intensive care                         | +                                             | +                     | +                            | +                                                       | +                        | +                                                    | –                         | –                                | –                                             | –                                   | –                                  | +                                                      |
| Antifungals within 30 d                | +                                             | +                     | +                            | –                                                       | +                        | –                                                    | +                         | +                                | –                                             | –                                   | –                                  | +                                                      |
| Concomitant bacteremia                 | +                                             | +                     | +                            | +                                                       | –                        | –                                                    | –                         | +                                | –                                             | –                                   | –                                  | +                                                      |
| Indwelling urinary catheter            | +                                             | +                     | +                            | +                                                       | +                        | –                                                    | +                         | +                                | –                                             | +                                   | +                                  | +                                                      |
| Day of isolation                       | 3                                             | 3                     | 20                           | 10                                                      | 18                       | 1                                                    | 3                         | 21                               | 9                                             | 1                                   | Day 10                             | Day 21                                                 |
| Therapy (dosage)*                      | CAS (loading dose of 70 mg, then 50 mg daily) | AMB (0.5 mg/kg BW)    | AMB (0.5 mg/kg BW)           | AMB (0.5 mg/kg BW)                                      | No antifungal given      | No antifungal given                                  | AMB (0.5 mg/kg BW)        | AMB (1 mg/kg BW)                 | CAS (loading dose of 70 mg, then 50 mg daily) | AMB (1 mg/kg BW)                    | FLU (400 mg OD)                    | CAS (loading dose of 70 mg, then 50 mg daily)          |
| Duration of therapy                    | 5 d                                           | 3 wk                  | 3 wk                         | 1 wk                                                    | Not given                | Not given                                            | 2 wk                      | 1 wk                             | 2 wk                                          | 2 wk                                | 4 wk                               | 2 wk                                                   |
| Clearance of candidemia*               | NA                                            | 10 d                  | 10 d                         | 7 d                                                     | NA                       | NA                                                   | Not achieved after 14 d   | 7 d                              | 10 d                                          | 7 d                                 | 3 wk                               | 10 d                                                   |
| Outcome                                | Died 8 d after admission                      | Discharge             | Discharge                    | Discharge                                               | Died 2 d after admission | Died on the day of admission                         | Died 17 d after admission | Died after 28 d                  | Discharged in a stable state                  | Discharged in a stable state        | Discharged on 2 wk of FLU          | Died 14 d after presentation                           |

\*PT, pre-term; TEF, tracheo-esophageal fistula; ICH, intracranial hemorrhage; ELBW, extremely low birth weight; DIC, disseminated intravascular coagulation; PDA, patent ductus arteriosus; ASD, atrial septal defect; IMV, invasive mechanical ventilation; ALL, acute lymphocytic leukemia; CKD, chronic kidney disease; DM, diabetes mellitus; ESRD, end-stage renal disease; COPD, chronic obstructive pulmonary disease; MODS, multi organ dysfunction syndrome; CVC, central venous catheter; CAS, caspofungin; AMB, amphotericin B, FLU, fluconazole; BW, body weight; NA, not assessed.

†Therapeutic failure was defined either as the persistence of *Candida* in the bloodstream despite administration of 3 d of antifungal therapy or as development of breakthrough candidemia while receiving antifungal agents for 3 d..
